# Supplementary material for: A cross-sectional study on interference control: age affects reactive control but not proactive control
Source: PeerJ. 2020 Jan 27;8:e8365. doi: 10.7717/peerj.8365 (PMC6991132; doi:10.7717/peerj.8365)
Supplement: Supplemental Information 1 [file peerj-08-8365-s001.xlsx]

## Sheet: Sheet1
sub	age1	age	gender	E years	AR	AA	RA	RR	MMSEs	high(cm)	weight(kg)
1	1	19	F	13	907.85	1672.82	612.76	423.28		163	51
2	1	20	F	13	813.08	1464.01	910.86	464.01		170	60
3	1	20	F	13	685.28	809.06	568.99	395.34		160	45
4	1	21	F	14	594.54	948.37	483.31	438.29		168	55
5	1	21	F	15	1280.22	1112.25	812.36	733.6		158	54
6	1	21	F	14	814.4	1180.08	767.65	625.16		165	51
7	1	21	F	15	685.03	1331.55	665.29	450.6		166	50
8	1	22	F	16	741.32	2924.81	954.04	418.93		150	42
9	1	22	F	14	993.48	1486.77	736.2	715.89		160	47
10	1	22	F	16	638.08	1070.6	606.84	472.64		162	60
11	1	22	F	15	690.12	825.83	572.56	665.5		169	56
12	1	22	M	14	985.96	2221.16	529.94	694.2		178	70
13	1	23	F	17	570.66	1804.7	556.56	428.7		156	48
14	1	23	F	17	620.37	896.87	599.17	453.84		158	45
15	1	23	F	16	754.27	996.91	727.86	660.83		169	58
16	1	23	F	17	610.1	717.04	528.53	507.66		164	58
17	1	23	F	16	725.97	1180.64	581.17	535.39		160	65
18	1	24	F	16	549.6	731.89	478.89	491.83		168	64
19	1	24	F	18	1292.77	1768.89	872.02	612.45		167	58
20	1	24	F	17	624.71	962.94	605.21	476.36		166	58
21	1	24	F	18	616.35	1099.18	559.14	399.9		165	61
22	1	24	F	18	1292.13	1282.83	1003.45	576.31		165	57
23	1	24	F	17	834.88	1979.95	686.14	585.73		167	58
24	1	24	F	18	1149.26	1328.84	694.6	429.08		165	53
25	1	25	F	18	697.63	1462.03	530.81	436.68		162	47
26	1	25	F	18	672.39	1707.23	813.32	569.31		168	58
27	1	25	F	18	991.33	1387.79	1074.51	928.04		172	57
28	1	25	M	19	790.16	1186.55	681.48	479.21		158	55
1	2	26	M	18	1034.64	1135.34	588.31	657.45		178	71
2	2	26	F	18	777.75	981.09	578.93	658.17		165	62
3	2	26	F	20	897.79	1221.56	604.64	542.01		161	57
4	2	26	M	20	720.64	1605.04	648.4	433.23		170	60
5	2	26	F	18	657.76	2052.81	593.78	465.11		161	54
6	2	27	M	20	512.72	452.58	385.55	375.64		170	60
7	2	27	F	20	1356.67	1514.58	914.53	693.75		161	53
8	2	27	M	20	1985.86	794.62	1267.28	1087.91		178	62
9	2	28	F	20	659.34	827.82	578.35	608.9		164	48
10	2	28	F	20	749.8	2064.17	610.65	424.52		163	60
11	2	28	M	21	899.77	1285.81	685.88	573.18		180	74
12	2	31	F	21	735.29	799.3	520.44	525.12		166	58
13	2	31	M	21	944.12	1299.51	969.52	808.95		177	72
14	2	32	F	20	2011.51	999.39	729.31	591.97		165	57
15	2	32	F	20	1272.22	1305.76	856.39	793.22		162	50
16	2	32	M	20	1159.73	1869.2	1343.99	887.74		183	70
17	2	33	M	20	707.37	1867.17	602.25	466.33		184	81
18	2	33	F	21	863.88	1334.48	1197.46	444.1		163	59
19	2	35	M	20	801.4	1884.67	689.47	683.49		170	72
20	2	35	M	20	1188.06	1098.55	758.71	884.59		170	80
21	2	35	F	21	708.08	2933.37	526.78	443.1		165	62
22	2	36	M	20	597.89	703.31	478.26	422.36		165	70
23	2	36	M	20	743.91	1995.73	541.09	430.54		168	60
24	2	36	M	20	1103.14	1161.93	764.11	675.23		170	80
25	2	37	M	21	621.6	980.46	509.82	580.15		180	75
26	2	37	M	20	1886.37	1372.88	1000.58	1061.6		174	81
27	2	39	M	12	771.12	2452.24	650.17	450.18		177	82
28	2	42	M	20	668.64	1388.78	471.77	380.92		180	95
1	3	46	F	12	1145.76	1388.05	1209.42	624.5		163	57
2	3	47	F	12	854.1	959.25	1132.9	586.87		160	65
3	3	48	F	16	1012.21	1467.83	848.93	512.9		162	59
4	3	48	F	12	1453	2648.35	1126.52	487.7		164	60
5	3	49	F	23	817.53	3005.78	689.34	543.87		155	54
6	3	50	F	12	1369.69	5527.06	1310.99	818.45		161	58
7	3	51	F	12	870.42	3271.58	731.15	722.98		161	55
8	3	52	F	16	598.77	3156.09	646.23	379.03		170	67
9	3	53	F	9	1176.42	2851.86	1050.55	672.48		158	65
10	3	53	F	12	712.14	752.21	613.37	517.33		164	60
11	3	54	F	16	1294.75	991.62	893.42	663.35		153	60
12	3	54	M	12	1044	3065.46	898.39	821.09		178	80
13	3	54	F	12	1681.26	3615.77	1227.37	940.18		163	64
14	3	54	F	9	658.97	1732.09	810.79	530.37		160	50
15	3	55	F	12	938.16	6032.38	1767.72	1131.4		155	61
16	3	55	F	16	990.34	1160.25	974.73	727.91		160	77
17	3	55	F	12	1161.19	3812.37	938.66	849.23		168	70
18	3	56	F	12	749.49	690.49	689.08	457.92		165	60
19	3	57	M	16	1333.16	4366.7	1044.62	771.24		168	64
20	3	58	F	12	728.5	1237.99	805.65	465.64		158	50
21	3	58	F	11	918.54	3452.92	989.82	560.2		163	56
22	3	58	F	16	998.52	2195.37	1250.92	876.63		165	68
23	3	58	F	12	853.63	1757.93	510.55	507.87		162	50
24	3	59	M	9	1023.46	1886.06	1019.95	992.15		168	65
25	3	59	F	12	1264.79	2269.51	1517.9	520.17		160	46
26	3	59	F	16	993.77	2507.26	848.87	668.86		158	47
27	3	59	F	12	1029.2	1768.73	1576.06	1076.15		155	59
28	3	59	F	12	1169.32	2095.83	1005.65	754.12		161	67.5
1	4	61	F	9	1298.63	2277.14	997.19	839.27	30	158	64
2	4	63	F	16	2007.55	2991.69	1518.74	1069.32	27	156	55
3	4	63	F	12	1272.54	4838.15	845.38	882.91	26	156	50
4	4	64	F	12	837.26	1210.33	787.91	664.35	30	158	65
5	4	64	M	12	1328.65	2171.16	1484.95	1003.93	27	168	60
6	4	64	F	16	960.92	1146.95	1207.83	520.25	30	158	55
7	4	64	F	9	757.87	3312.9	865.07	534.59	26	162	62
8	4	64	F	16	750.61	2755.15	820.51	487.49	27	161	67.5
9	4	65	M	12	1546.58	1343.41	1043.77	833.64	27	164	70
10	4	65	F	12	1500.29	1289.81	1305.26	950.02	26	156	55
11	4	65	F	12	701.95	2689	546.03	406.96	29	157	53
12	4	65	F	12	1065.27	1335.18	1174.47	546.97	30	160	60
13	4	66	F	9	2223.93	2882.38	2108.82	1438.71	27	153	56
14	4	66	F	12	887.84	1553.82	1129.97	1543.86	29	157	65
15	4	66	M	12	934.28	4169.66	1165.68	734.92	28	178	75
16	4	68	M	16	2758.36	6806.54	1116.56	2116.63	27	166	69
17	4	69	F	12	758.29	2794.93	944.9	554.79	27	156	50
18	4	69	F	9	1166.61	3233.22	860.43	799.66	30	158	65
19	4	70	F	16	1227.51	2643.14	1199.57	1189.44	27	162	53
20	4	70	F	12	1445.22	1531.41	1012.67	646.79	26	158	55
21	4	70	M	11	663.36	1922.58	1093.8	338.84	20	166	65
22	4	70	F	12	890.06	1196.23	776.11	836.62	30	157	45.5
23	4	70	F	12	1173.26	2018.77	801.94	594.83	30	156	54
24	4	71	F	16	1232.18	2313.14	1417.32	739.52	30	162	50
25	4	72	F	12	1042.08	3096.29	1198.78	602.83	29	157	57
26	4	76	M	12	1271.82	3313.58	614.17	548.8	26	175	70
27	4	77	M	11	845.51	1094.9	1751.07	1153.85	30	173	63
28	4	78	F	12	1337.35	1303.21	1290.64	1028.82	26	162	61
